# Supplementary material for: Antibody and T cell responses to COVID-19 vaccination in patients receiving anticancer therapies
Source: J Immunother Cancer. 2022 Jun 22;10(6):e004766. doi: 10.1136/jitc-2022-004766 (PMC9226983; doi:10.1136/jitc-2022-004766)
Supplement: Supplementary data [file jitc-2022-004766supp002.xlsx]

## Sheet: Table S1 Post-vaccination
Table S1: Clinical and immunological data post-vaccination
											Baseline samples			Post-dose 1 samples			Post-dose 2 samples			ICS T cell reactivity after dose 2						Post-dose 3 samples
Pre-vaccine COVID infection	Analysis category	Analysis subcategory	Cancer vs HD	Cancer Type	Cancer subtype	ECOG	Sex	Steroids	stage	Vaccine manufacturer	Baseline sample: days from vaccine dose 1	Baseline RBD titer	Baseline Spike titer	Dose 1 sample: days post dose-1	Post-Dose 1 RBD	Post-Dose 1 Spike	Post-Dose 2 sample: Days post dose 1	Post-Dose 2 RBD titer	Post-Dose 2 Spike titer	WT Spike-reactive CD4s	WT Spike-reactive CD8s	CEF reactive CD4 T cells	CEF-reactive CD8 T cells	Delta S-peptide reactive CD4s	Delta S-peptide reactive CD8s	Post-Dose 3 sample: Days post dose 1	Post-Dose 3 sample: Days post dose 3	Post-Dose 3 RBD titer	Post-Dose 3 Spike titer
FALSE	B cell	B cell - BTK inhibitor, daratumumab, venetoclax, proteosome inhibitors	Cancer	Heme	CLL	0	Male	No	non-TNM	Pfizer							108	10	10	0	0	N/A	N/A	0.08034	0.04183
FALSE	B cell	B cell - BTK inhibitor, daratumumab, venetoclax, proteosome inhibitors	Cancer	Heme	CLL	0	Male	No	non-TNM	Pfizer				14	10	10	42	10	10	0.045654	0.08411	N/A	N/A	N/A	N/A
FALSE	B cell	B cell - BTK inhibitor, daratumumab, venetoclax, proteosome inhibitors	Cancer	Heme	Multiple myeloma	0	Female	Yes	non-TNM	Pfizer							76	140.857	537.42	0	0.03156	0	0.04327	0	0.03791	244	28	259.194	1061.08
FALSE	B cell	B cell - BTK inhibitor, daratumumab, venetoclax, proteosome inhibitors	Cancer	Heme	Multiple myeloma	0	Male	Yes	non-TNM	Pfizer							134	10	162.695	0.00724	0	0	0.25597	0	0
FALSE	B cell	B cell - BTK inhibitor, daratumumab, venetoclax, proteosome inhibitors	Cancer	Heme	Multiple myeloma	0	Male	No	non-TNM	Pfizer							42	144.847	334.922	0	0	0	0.82125	0.0067	0	224	19	1405.43	8472.85
TRUE	B cell	B cell - BTK inhibitor, daratumumab, venetoclax, proteosome inhibitors	Cancer	Heme	Multiple myeloma	0	Female	No	non-TNM	Pfizer							52	5606.96	41068.4	0.13126	0	0	0.77337	0	0
TRUE	B cell	B cell - BTK inhibitor, daratumumab, venetoclax, proteosome inhibitors	Cancer	Heme	Multiple myeloma	0	Female	No	non-TNM	Pfizer							74	13682.9	268594	0.112688	0	0	0.001209	0.002378	0.02358	270	56	4145.46	78439.1
FALSE	B cell	B cell - BTK inhibitor, daratumumab, venetoclax, proteosome inhibitors	Cancer	Heme	Multiple myeloma	1	Female	Yes	non-TNM	Pfizer							52	19.0146	516.275	0.08716	0.00143	0.00484	0	0	0.00049
FALSE	B cell	B cell - BTK inhibitor, daratumumab, venetoclax, proteosome inhibitors	Cancer	Heme	Multiple myeloma	0	Male	No	non-TNM	Pfizer							69	10	138.679	0.01701	0.01488	0.02159	0.03451	0.00163	0.064	211	11	151.466	754.579
TRUE	B cell	B cell - BTK inhibitor, daratumumab, venetoclax, proteosome inhibitors	Cancer	Heme	Multiple myeloma	0	Male	Yes	non-TNM	Pfizer				14	1660.58	7346.01	36	2608.38	12369.2	0.3467	0	0.08635	0	0	0	119	12	4389.6	29180.4
FALSE	B cell	B cell - BTK inhibitor, daratumumab, venetoclax, proteosome inhibitors	Cancer	Heme	Multiple myeloma	0	Female	No	non-TNM	Pfizer				11	10	10	39	204.75	490.538
FALSE	B cell	B cell - BTK inhibitor, daratumumab, venetoclax, proteosome inhibitors	Cancer	Heme	Multiple myeloma	1	Female	Yes	non-TNM	Pfizer							142	10	154.167							257	14	686.073	2764.43
FALSE	B cell	B cell - BTK inhibitor, daratumumab, venetoclax, proteosome inhibitors	Cancer	Heme	Multiple myeloma	0	Male	Yes	non-TNM	Pfizer							104	10	74.4743							202	42	31.2847	266.362
FALSE	B cell	B cell - BTK inhibitor, daratumumab, venetoclax, proteosome inhibitors	Cancer	Heme	Multiple myeloma	0	Male	Yes	non-TNM	Pfizer							117	81.2835	245.915							266	65	29.1123	160.34
FALSE	B cell	B cell - CD20	Cancer	Heme	Lymphoma	0	Female	No	non-TNM	Pfizer							84	1465.27	3185.17	0.252903	0	0	4.46228	0.001252	0.01373
FALSE	B cell	B cell - CD20	Cancer	Heme	Lymphoma	0	Male	No	non-TNM	Pfizer							32	10	10	0	0	0	0.00052	N/A	N/A	242	62	10	10
FALSE	B cell	B cell - CD20	Cancer	Heme	Lymphoma	1	Female	No	non-TNM	Pfizer							92	10	10	0.06109	0.0115	N/A	N/A	0.0388	0
TRUE	B cell	B cell - CD20	Cancer	Skin	Melanoma; prior lymphoma	0	Male	No	IV	Pfizer							49	10	10	0.65866	0.04614	0	0.03307	0.03421	0.05802	168	13	10	10
FALSE	Chemo	Chemo - NA	Cancer	GU	Bladder Cancer	1	Male	No	IV	Moderna							114	1542.09	3056.4							296	68	4261.95	6973.42
FALSE	Chemo	Chemo - NA	Cancer	GI	Cholangiocarcinoma	1	Female	Yes	IV	Pfizer							35	272.061	2358.38	0.15955	0.316	0.02704	0	0.1022	0
FALSE	Chemo	Chemo - NA	Cancer	GI	Cholangiocarcinoma	1	Male	Yes	IV	Pfizer							142	84.2225	476.742
FALSE	Chemo	Chemo - NA	Cancer	GI	Colorectal or anal cancer	0	Male	Yes	IV	Pfizer							34	926.908	10152.2	0.049318	0	0	0.18161	0	0	216	56	862.476	7121.63
FALSE	Chemo	Chemo - NA	Cancer	GI	Colorectal or anal cancer	0	Female	Yes	III	Pfizer				17	20.1742	281.124	31	2774.9	11782.2	0.181282	0	0	0.025512	N/A	N/A
FALSE	Chemo	Chemo - NA	Cancer	GI	Colorectal or anal cancer	1	Female	No	IV	Pfizer				20	10	116.782
FALSE	Chemo	Chemo - NA	Cancer	GI	Gastric or esophageal cancer	0	Male	Yes	IV	Pfizer							49	536.063	3003.31	0.150438	0.043	0	0.09335	0	0.00658	217	56	6160.19	44294.9
TRUE	Chemo	Chemo - NA	Cancer	GI	Gastric or esophageal cancer	0	Male	No	IV	Moderna							50	8266.49	143086
FALSE	Chemo	Chemo - NA	Cancer	Thoracic	Lung Cancer	1	Female	No	IV	Pfizer							68	10	38.8144	0.03162	0	N/A	N/A	N/A	N/A
FALSE	Chemo	Chemo - NA	Cancer	Thoracic	Lung Cancer	0	Female	Yes	IIB	Pfizer							56	1608.01	6964
FALSE	Chemo	Chemo - NA	Cancer	Thoracic	Lung Cancer	1	Female	Yes	IIIA	Moderna							77	4973.43	10287.4
FALSE	Chemo	Chemo - NA	Cancer	Thoracic	Lung Cancer	2	Female	No	IIB	Pfizer							57	10	10
FALSE	Chemo	Chemo - NA	Cancer	Skin	Melanoma	0	Male	Yes	IV	Pfizer							60	167.645	1356.43	0	0	0	0.0821	0	0
TRUE	Chemo	Chemo - NA	Cancer	Skin	Melanoma	0	Female	No	IV	Moderna							61	5894.74	16920.4	0.117485	0	0.077877	1.33549	0.057557	0
FALSE	Chemo	Chemo - NA	Cancer	Skin	Melanoma	2	Male	Yes	IV	Pfizer							68	28.9195	285.022	0.047	0	N/A	N/A	N/A	N/A
TRUE	Chemo	Chemo - NA	Cancer	Thoracic	Mesothelioma	0	Female	No	IV	Pfizer							37	13631.2	557525	0.25246	0.006394	0	0.02123	0.02701	0.006972	233	49	4591.73	16818.4
FALSE	Chemo	Chemo - NA	Cancer	GI	Pancreatic Cancer	1	Female	Yes	III	Pfizer							69	199.102	1242.9	0.04139	0.01825	0	0.09204	0.002397	0.01092	212	55	1661.04	4681.46
FALSE	Chemo	Chemo - NA	Cancer	GI	Pancreatic Cancer	0	Male	Yes	III	Pfizer							51	33.2105	2124.11	0.117513	0.00811	0.117689	0.01215	0	0	222	17	2340.27	8635.85
FALSE	Chemo	Chemo - NA	Cancer	GU	Prostate Cancer	0	Male	Yes	IV	Pfizer				17	86.7355	443.365	38	2329.96	4500.23	0.148624	0	0	2.67614	0	0	234	84	2390.22	4514.21
FALSE	ChemoIO	ChemoIO - NA	Cancer	H&N	Head & Neck	1	Male	Yes	III	Pfizer				17	176.222	1085.32	41	2745.89	17867.2	0	0	0	0	0	0
TRUE	ChemoIO	ChemoIO - NA	Cancer	Thoracic	Lung Cancer	0	Female	No	IV	Pfizer							95	10003.4	140844	0.06066	0	0	0.00468	0.01262	0.02574
FALSE	ChemoIO	ChemoIO - NA	Cancer	Thoracic	Lung Cancer	0	Female	Yes	IV	Pfizer	0	10	10	21	75.4214	358.351	42	1362.85	5697.03
FALSE	ChemoIO	ChemoIO - NA	Cancer	Thoracic	Lung Cancer	1	Male	No	IV	Pfizer							78	395.193	1005.52
FALSE	ChemoIO	ChemoIO - NA	Cancer	Thoracic	Mesothelioma	0	Male	No	IIIb	Pfizer							85	3485.14	12223.2
FALSE	ChemoIO	ChemoIO - NA	Cancer	GI	Pancreatic Cancer	1	Male	Yes	IV	Pfizer							105	31.4223	17.238	0.032786	0	N/A	N/A	0.008073	0
FALSE	ChemoIO	ChemoIO - NA	Cancer	GU	Urothelial	1	Female	No	III	Pfizer				28	157.501	321.384	49	7977.32	345583	0	0	0	4.36326	0	0
FALSE	HD	HD - NA	HD	HD	HD	HD	Female	HD	HD	Pfizer	-226	10	10				40	2371.63	7707.58	0.018344	0.01596	0	1.11591	0	0
FALSE	HD	HD - NA	HD	HD	HD	HD	Male	HD	HD	Pfizer							43	975.49	1644.52	0.04578	0.003671	0	0	0	0
FALSE	HD	HD - NA	HD	HD	HD	HD	Female	HD	HD	Pfizer	-194	10	10	20	104.256	448.381	41	994.811	1651.39	0.0898	0.04677	0	1.00601	0	0
FALSE	HD	HD - NA	HD	HD	HD	HD	Male	HD	HD	Pfizer	-171	10	10				37	1251.99	2147.3	0.140694	0	0	0.89994	0	0
FALSE	HD	HD - NA	HD	HD	HD	HD	Female	HD	HD	Pfizer							41	6266.87	3286.01	0.347649	0	0	0	0	0
FALSE	HD	HD - NA	HD	HD	HD	HD	Female	HD	HD	Pfizer							46	1153.31	2926.64	0.05914	0	0.00608	1.5169	0.001651	0
FALSE	HD	HD - NA	HD	HD	HD	HD	Male	HD	HD	Pfizer	-127	10	10	21	120.355	510.615	42	1865.54	2969.39	0.12372	0.01681	0.02016	0.00526	0.00397	0
FALSE	HD	HD - NA	HD	HD	HD	HD	Male	HD	HD	Pfizer							41	514.343	441.72	0.1136	0.01776	0.0234	0.217775	0.01583	0.0044
FALSE	HD	HD - NA	HD	HD	HD	HD	Female	HD	HD	Pfizer	-207	10	10				44	2064.23	1999.6	0.071143	0.05147	0.028363	0.31269	0	0
FALSE	HD	HD - NA	HD	HD	HD	HD	Female	HD	HD	Pfizer							40	329.264	625.876	0.191515	0.01211	0.09465	0.0214095	0	0
FALSE	HD	HD - NA	HD	HD	HD	HD	Male	HD	HD	Pfizer	-219	10	10	20	140.616	841.122	40	1892.18	4856.08	0.1582	0	N/A	N/A	N/A	N/A
FALSE	HD	HD - NA	HD	HD	HD	HD	Female	HD	HD	Pfizer							117	129.254	475.557
FALSE	HD	HD - NA	HD	HD	HD	HD	Female	HD	HD	Pfizer							108	137.673	354.092
FALSE	HD	HD - NA	HD	HD	HD	HD	Female	HD	HD	Pfizer							114	212.611	634.141
FALSE	HD	HD - NA	HD	HD	HD	HD	Female	HD	HD	Pfizer							48	372.472	1244.17
FALSE	HD	HD - NA	HD	HD	HD	HD	Female	HD	HD	Pfizer	-194	10	10				42	818.854	1290.93
FALSE	HD	HD - NA	HD	HD	HD	HD	Female	HD	HD	Pfizer							95	905.451	2772.26
FALSE	HD	HD - NA	HD	HD	HD	HD	Male	HD	HD	Pfizer							114	378.089	743.471
FALSE	HD	HD - NA	HD	HD	HD	HD	Male	HD	HD	Pfizer							54	410.937	1881.91
FALSE	HD	HD - NA	HD	HD	HD	HD	Male	HD	HD	Pfizer	-208	10	10	19	120.295	518.629	44	1821.65	5594.8
FALSE	HD	HD - NA	HD	HD	HD	HD	Male	HD	HD	Pfizer							51	1956.78	3605.69
FALSE	HD	HD - NA	HD	HD	HD	HD	Male	HD	HD	Pfizer							65	2558.56	4784.02
FALSE	IO	IO - Non-PD-1	Cancer	Skin	Melanoma	0	Female	No	IV	Pfizer							84	771.313	2935.74							287	11	5495.29	83000.8
FALSE	IO	IO - Non-PD-1	Cancer	Skin	Melanoma	0	Female	No	IV	Pfizer							36	9094.56	11454.7
TRUE	IO	IO - PD-1	Cancer	GU	Bladder Cancer	2	Female	No	IV	Pfizer							92	3150.64	8395.17	0	0	0	0.00879	0	0
FALSE	IO	IO - PD-1	Cancer	GU	Bladder Cancer	0	Male	No	IV	Pfizer							56	2440.46	6670.53
FALSE	IO	IO - PD-1	Cancer	Breast/Gyn	Cervical or endometrial cancer	1	Female	No	IV	Pfizer							131	2132.06	5075.3							278	21	5378.67	111054
FALSE	IO	IO - PD-1	Cancer	Breast/Gyn	Cervical or endometrial cancer	1	Female	No	IV	Pfizer							118	264.366	501.752
FALSE	IO	IO - PD-1	Cancer	Breast/Gyn	Cervical or endometrial cancer	2	Female	No	IIIC	Pfizer							55	323.26	1406.05	0.02591	0.01334	0	1.78734	0	0
FALSE	IO	IO - PD-1	Cancer	GI	Colorectal or anal cancer	1	Male	No	IV	Pfizer							127	363.86	1134.12							241	28	2001.07	8065.48
FALSE	IO	IO - PD-1	Cancer	GI	Colorectal or anal cancer	2	Female	No	IV	Pfizer							87	18.8686	476.693	0.60438	0	0	0.00344	N/A	N/A
FALSE	IO	IO - PD-1	Cancer	GI	Colorectal or anal cancer	0	Female	No	IV	Pfizer							37	6442.9	21682
FALSE	IO	IO - PD-1	Cancer	Skin	Cutaneous squamous cell carcinoma	1	Male	No	IV	Pfizer							42	1238.26	4098.2	0.12663	0	0	0	0.04486	0
FALSE	IO	IO - PD-1	Cancer	Skin	Cutaneous squamous cell carcinoma	1	Male	No	IV	Pfizer							38	49.9152	12.8191	0.067036	0	0.000282	0	N/A	N/A	206	28	21.5729	1814.15
FALSE	IO	IO - PD-1	Cancer	GI	Gastric or esophageal cancer	0	Male	No	IV	Pfizer							167	112.832	305.37
FALSE	IO	IO - PD-1	Cancer	H&N	Head & Neck	1	Male	No	IV	Pfizer				13	135.908	141.894	34	206.115	1225.32	0.01922	0.05926	N/A	N/A	N/A	N/A
FALSE	IO	IO - PD-1	Cancer	H&N	Head & Neck	0	Male	No	IV	Pfizer							80	730.86	222.552							220	56	922.022	4664.97
FALSE	IO	IO - PD-1	Cancer	Thoracic	Lung Cancer	1	Female	No	IV	Pfizer							33	5755.78	15003.3	0.02248	0.034889	0	0.1963	0	0
FALSE	IO	IO - PD-1	Cancer	Thoracic	Lung Cancer	0	Female	No	IV	Pfizer							49	7865.59	10639.2	0.12398	0.28744	0	5.49845	0.03184	0.21239	266	20	14751.7	207860
FALSE	IO	IO - PD-1	Cancer	Thoracic	Lung Cancer	1	Male	No	IVA	Pfizer							66	215.536	1207.13	0	0.0096	0	0.05862	N/A	N/A
FALSE	IO	IO - PD-1	Cancer	Thoracic	Lung Cancer	1	Male	No	IIIB	Pfizer							48	1858.68	7762.08	0.28327	0	N/A	N/A	N/A	N/A	300	64	1484.12	8524.98
FALSE	IO	IO - PD-1	Cancer	Thoracic	Lung Cancer	1	Female	No	IIIB	Moderna							127	1007.97	4753.04
FALSE	IO	IO - PD-1	Cancer	Thoracic	Lung Cancer	1	Female	No	IV	Pfizer				16	28.1806	739.805	38	1067.89	6439.05
FALSE	IO	IO - PD-1	Cancer	Thoracic	Lung Cancer	1	Female	No	IIB	Pfizer				21	73.5284	209.901	48	1774.6	5048.92							259	21	1955.57	7097.37
FALSE	IO	IO - PD-1	Cancer	Thoracic	Lung Cancer	1	Female	No	IV	Moderna							131	1884.76	4399.52
FALSE	IO	IO - PD-1	Cancer	Heme	Lymphoma	0	Female	No	non-TNM	Pfizer							75	10	68.6303	0.563	0	0.02264	0.05978	0.143	0	264	31	288.891	2664.09
FALSE	IO	IO - PD-1	Cancer	Skin	Melanoma	1	Male	No	IV	Pfizer							45	891.095	1186.54	0.01882	0	0	5.50579	0	0.696438
FALSE	IO	IO - PD-1	Cancer	Skin	Melanoma	0	Female	No	IV	Pfizer				18	39.5772	64.8017	46	545.835	3232.12	0.022516	0.05351	0.039117	0.05042	0.001345	0
FALSE	IO	IO - PD-1	Cancer	Skin	Melanoma	0	Female	No	IV	Pfizer							91	2202.69	3274.35	0.111833	0.02361	0.046914	0.60172	0.006566	0.01912
FALSE	IO	IO - PD-1	Cancer	Skin	Melanoma	0	Female	No	IIIB	Pfizer							91	1643.38	2179.53	0.21953	0.0788	N/A	N/A	0.08184	0.04403
FALSE	IO	IO - PD-1	Cancer	Skin	Melanoma	0	Female	No	IV	Moderna							45	2068.05	3538.13	0.78553	0.03575	N/A	N/A	N/A	N/A
FALSE	IO	IO - PD-1	Cancer	Skin	Melanoma	0	Female	No	IV	Moderna							137	5640.47	4562.85
FALSE	IO	IO - PD-1	Cancer	Skin	Melanoma	1	Female	No	IV	Moderna							82	3390.68	4286.7
TRUE	IO	IO - PD-1	Cancer	Thoracic	Mesothelioma	0	Female	No	II	Pfizer							91	9222.61	253211	0.04466	0.01779	0	11.467	0	0.0091
FALSE	IO	IO - PD-1	Cancer	Thoracic	Mesothelioma	1	Female	No	IV	Pfizer							36	2548.33	11412.2	0.12172	0.001297	N/A	N/A	0.02758	0
FALSE	IO	IO - PD-1	Cancer	Thoracic	Mesothelioma	1	Male	No	IV	Moderna							141	68.9182	99.8622
FALSE	IO	IO - PD-1	Cancer	GI	Pancreatic Cancer	0	Female	No	IV	Moderna							78	4712.13	13671.9	0.27298	0	0.06899	0.06654	N/A	N/A	239	66	184.212	1590.41
FALSE	IO	IO - PD-1	Cancer	GU	Renal	1	Female	No	IV	Pfizer							107	136.286	449.304	0.67418	0.00185	0	0.0003	0	0	282	77	1165.61	3741.38
FALSE	IO	IO - PD-1	Cancer	GU	Renal	0	Male	No	IV	Moderna							94	3678.68	5909.6
FALSE	IO	IO - PD-1	Cancer	GU	Urothelial	1	Male	No	IV	Pfizer							101	84.7596	490.634	0.18938	0.02429	0	0.14815	0	0	269	29	281.156	2949.46
FALSE	Not on Tx	Not on Tx - Had not yet received treatment	Cancer	GU	Bladder Cancer	0	Male	No	IV	Pfizer							129	1325.28	3416.89							283	21	6107.81	31862.6
FALSE	Not on Tx	Not on Tx - Had not yet received treatment	Cancer	Breast/Gyn	Breast Cancer	0	Female	No	IIA	Pfizer							95	674.926	1570.24
FALSE	Not on Tx	Not on Tx - Had not yet received treatment	Cancer	GI	Gastric or esophageal cancer	1	Female	No	IV	Pfizer							95	386.046	1196.93	0.12014	0	0	0	N/A	N/A
FALSE	Not on Tx	Not on Tx - Had not yet received treatment	Cancer	H&N	Head & Neck	0	Male	No	IV	Pfizer							67	10461.4	15959.8	0	0	0	0	0	0	213	69	80.7417	534.163
FALSE	Not on Tx	Not on Tx - Had not yet received treatment	Cancer	H&N	Head & Neck	0	Male	No	IV	Pfizer							123	852.661	1883.56							259	63	4239.45	18232.6
FALSE	Not on Tx	Not on Tx - Had not yet received treatment	Cancer	Heme	Lymphoma	1	Female	No	non-TNM	Pfizer							42	527.18	2208.41	0	0	0	0.02156	N/A	N/A
FALSE	Not on Tx	Not on Tx - Had not yet received treatment	Cancer	Skin	Melanoma	0	Female	No	III	Pfizer							87	260.412	604.847							227	56	1968.58	4268.16
FALSE	Not on Tx	Not on Tx - Had not yet received treatment	Cancer	Breast/Gyn	Ovarian carcinoma	2	Female	No	IV	Pfizer							235	376.304	773.066							277	21	2455.12	9010.42
FALSE	Not on Tx	Not on Tx - Had not yet received treatment	Cancer	GI	Pancreatic Cancer	1	Male	No	IB	Pfizer							140	47.9017	484.09	0.11357	0.00689	0	0.1875	0	0
FALSE	Not on Tx	Not on Tx - On surveillance	Cancer	Thoracic	Lung Cancer	1	Female	No	IIIB	Pfizer							137	762.843	2054.84
FALSE	Not on Tx	Not on Tx - On surveillance	Cancer	Thoracic	Lung Cancer	2	Male	No	IV	Pfizer							116	312.837	1106.85
FALSE	Not on Tx	Not on Tx - On surveillance	Cancer	Heme	Lymphoma	0	Male	No	non-TNM	Pfizer							168	489.494	1528.11
FALSE	Not on Tx	Not on Tx - On surveillance	Cancer	Heme	Lymphoma	0	Female		non-TNM	Pfizer																301	42	57.9212	235.305
FALSE	Not on Tx	Not on Tx - On surveillance	Cancer	Skin	Melanoma	0	Male	No	IV	Pfizer							89	62.9845	652.478	0.05461	0	0	0.21282	0	0.49807	278	31	1158.25	3532.11
FALSE	Not on Tx	Not on Tx - On surveillance	Cancer	Skin	Melanoma	0	Male	No	IV	Pfizer							73	5703.11	11810.8	0.090859	0	0	0.62347	0	0
FALSE	Not on Tx	Not on Tx - On surveillance	Cancer	Skin	Melanoma	0	Female	No	IV	Pfizer							103	1403.2	2868.76	0.11872	0	0.09376	0.30381	0	0
FALSE	Not on Tx	Not on Tx - On surveillance	Cancer	Skin	Melanoma	0	Male	No	IV	Pfizer							122	476.041	1367.77	0.03882	0.04894	0.16031	0.99072	0	0.00499	318	73	802.853	2645.78
FALSE	Not on Tx	Not on Tx - On surveillance	Cancer	Skin	Melanoma	0	Male	No	III	Pfizer							55	1135.66	2701.71	0	0.03317	N/A	N/A	N/A	N/A
FALSE	Not on Tx	Not on Tx - On surveillance	Cancer	Skin	Melanoma	0	Female	No	IV	Pfizer							193	460.144	1411.39
FALSE	Not on Tx	Not on Tx - On surveillance	Cancer	Skin	Melanoma	0	Female	No	III	Moderna				25	5502.68	9636.35	214	656.486	2611.73
FALSE	Not on Tx	Not on Tx - On surveillance	Cancer	Skin	Melanoma	0	Female	No	IV	Moderna							96	667.965	1553.41							285	28	869.544	2840.25
FALSE	Not on Tx	Not on Tx - On surveillance	Cancer	Skin	Melanoma	0	Female	No	IV	Moderna							54	716.659	2434.6
FALSE	Not on Tx	Not on Tx - On surveillance	Cancer	Skin	Melanoma	0	Female	No	IV	Pfizer							32	5007.45	39692.4
FALSE	Not on Tx	Not on Tx - On surveillance	Cancer	Skin	Melanoma	0	Male	No	IV	Pfizer							61	1211.33	3211.78
FALSE	Not on Tx	Not on Tx - On surveillance	Cancer	Skin	Melanoma	0	Male	No	IV	Moderna							75	1393.3	2969.91
FALSE	Not on Tx	Not on Tx - On surveillance	Cancer	Skin	Melanoma	0	Male	No	IV	Pfizer							39	1585.75	2814.63
TRUE	Not on Tx	Not on Tx - On surveillance	Cancer	Skin	Melanoma	0	Female	No	III	Moderna							153	294.293	2760.6
FALSE	Not on Tx	Not on Tx - On surveillance	Cancer	GU	Urothelial	0	Male	No	II	Pfizer							112	752.377	2550.79	0	0	0	0	0	0
FALSE	TKI	TKI - Endocrine	Cancer	GU	Prostate Cancer	0	Male	No	IV	Pfizer							128	9.99059	106.908	0.03616	0	0	0.17048	0	0	312		67.3139	1054.58
FALSE	TKI	TKI - Endocrine	Cancer	GU	Prostate Cancer	0	Male	No	IV	Pfizer							38	517.227	2317.84	0.043077	0	0	1.04405	N/A	N/A
FALSE	TKI	TKI - Endocrine	Cancer	GU	Prostate Cancer	0	Male	No	IV	Pfizer							80			0	0.01823	N/A	N/A	N/A	N/A
FALSE	TKI	TKI - Targeted	Cancer	Breast/Gyn	Breast Cancer	0	Female	No	IV	Pfizer							35	4193.89	10886.4	0	0.01291	N/A	N/A	0	0.02097
FALSE	TKI	TKI - Targeted	Cancer	Skin	Melanoma	0	Female	No	IV	Pfizer				18	61.4222	114.842	98	78.3323	132.488	0	0	0	0.073245	0	0
FALSE	TKI	TKI - Targeted	Cancer	Skin	Melanoma	0	Male	No	III	Pfizer							63	4396.06	13867.9
TRUE	TKI	TKI - Targeted	Cancer	Heme	Myelodysplastic Syndrome	0	Male	No	non-TNM	Pfizer							32	4707.7	122379	0	0	N/A	N/A	N/A	N/A
FALSE	TKI	TKI - Targeted	Cancer	GU	Renal	2	Male	No	IV	Pfizer							103	387.244	1630.21

## Sheet: Table S2 Post-infection
Table S2: Post-infection RBD and Spike titers
Analysis category	# days post-symptom onset	Sex	Cancer type	RBD IgG Titer	Spike IgG titer
Post-Infection Cancer	14	M	Melanoma	566.707	3015.97
Post-Infection Cancer	14	F	Pituitary	2300.02	4779.71
Post-Infection Cancer	10	F	Lymphoma	10	10
Post-Infection Cancer	36	M	MDS	1434.09	7350.79
Post-Infection Cancer	10	F	Breast	738.916	2039.41
Post-Infection Cancer	47	F	Breast	221.309	1448.27
Post-Infection Cancer	13	M	Lung	239.464	3065.8
Post-Infection Cancer	14	M	Multiple myeloma	133.033	2039.29
Post-Infection Cancer	13	F	Lung	3000.84	7129.73
Post-Infection Cancer	72	F	Multiple myeloma	2303.03	9173.6
Post-Infection Non-cancer, not immunocompromised	13	M		1862.58	4169.77
Post-Infection Non-cancer, not immunocompromised	87	F		73.9373	310.367
Post-Infection Non-cancer, not immunocompromised	84	M		182.376	469.442
Post-Infection Non-cancer, not immunocompromised	45	M		487.683	1954.26
Post-Infection Non-cancer, not immunocompromised	40	M		413.766	1134.62
Post-Infection Non-cancer, not immunocompromised	11	F		247.724	880.356
Post-Infection Non-cancer, not immunocompromised	12	F		75.2778	924.392
Post-Infection Non-cancer, not immunocompromised	13	M		18.9613	183.21
Post-Infection Non-cancer, not immunocompromised	11	M		3869.35	14531.5
Post-Infection Non-cancer, not immunocompromised	11	M		2249.87	4813.47
Post-Infection Non-cancer, not immunocompromised	12	M		3946.36	8763.93
Post-Infection Non-cancer, not immunocompromised	11	M		982.168	6181.25
Post-Infection Non-cancer, not immunocompromised	10	M		70.3884	60.2807
Post-Infection Non-cancer, not immunocompromised	12	F		3220.15	8074.53
Post-Infection Non-cancer, not immunocompromised	13	F		87.1391	6571.82
Post-Infection Non-cancer, not immunocompromised	58	M		287.014	778.264
Post-Infection Non-cancer, not immunocompromised	10	F		71.2365	32.1357
Post-Infection Non-cancer, not immunocompromised	55	M		2702.3	9092.85
Post-Infection Non-cancer, not immunocompromised	10	F		10	141.822
Post-Infection Non-cancer, not immunocompromised	12	F		10	10
Post-Infection Non-cancer, not immunocompromised	12	M		186.787	391.799
Post-Infection Non-cancer, not immunocompromised	11	M		86.1554	550.597
Post-Infection Non-cancer, not immunocompromised	11	M		4436.99	4126.02
Post-Infection Non-cancer, not immunocompromised	14	F		2723.4	5035.85
Post-Infection Non-cancer, not immunocompromised	14	F		241.647	1555.77
Post-Infection Non-cancer, not immunocompromised	38	M		10	55.8848
Post-Infection Non-cancer, not immunocompromised	12	F		10	10
Post-Infection Non-cancer, not immunocompromised	13	M		1513.14	6318.85
Post-Infection Non-cancer, not immunocompromised	11	F		1091.5	2866.23
Post-Infection Non-cancer, not immunocompromised	35	M		2805.52	10332.4
Post-Infection Non-cancer, not immunocompromised	23	F		777.994	2950.89
Post-Infection Non-cancer, not immunocompromised	14	M		479.893	1666.09
Post-Infection Non-cancer, not immunocompromised	35	M		1712.74	5212.35
Post-Infection Non-cancer, not immunocompromised	35	M		2044.73	8436.34
Post-Infection Non-cancer, not immunocompromised	49	M		1755.08	8587.76
Post-Infection Non-cancer, not immunocompromised	14	M		10	342.177
Post-Infection Non-cancer, not immunocompromised	11	M		208.663	670.77
Post-Infection Non-cancer, not immunocompromised	14	F		72.4489	484.58
Post-Infection Non-cancer, not immunocompromised	62	F		201.475	902.169
Post-Infection Non-cancer, not immunocompromised	13	M		1342.04	4664.49
Post-Infection Non-cancer, not immunocompromised	14	M		337.2	743.903
Post-Infection Non-cancer, not immunocompromised	14	F		5923.45	19395.9
Post-Infection Non-cancer, not immunocompromised	13	M		432.748	1802.94
Post-Infection Non-cancer, not immunocompromised	11	F		4219.79	8467.5
Post-Infection Non-cancer, not immunocompromised	11	F		1404.11	7580.46
Post-Infection Non-cancer, not immunocompromised	12	M		24.2515	179.695
Post-Infection Non-cancer, not immunocompromised	12	F		10	81.2699
Post-Infection Non-cancer, not immunocompromised	35	F		12556.7	47866.1
Post-Infection Non-cancer, not immunocompromised	10	F		2589.53	37960.9
Post-Infection Non-cancer, not immunocompromised	75	M		728.753	3028.81
Post-Infection Non-cancer, not immunocompromised	13	F		3039.6	8848.13
Post-Infection Non-cancer, not immunocompromised	35	M		9643.88	27597.9
Post-Infection Non-cancer, not immunocompromised	35	F		7885.82	6162.94
Post-Infection Non-cancer, not immunocompromised	49	M		22964.7	117295
Post-Infection Non-cancer, not immunocompromised	59	F		1181.7	4341.46
